# Supplementary material
Source: PubMed Central journal article supplement (PMC2922158)
Supplement: 1003693107_pnas.1003693107_SI.pdf [file 1003693107_pnas.1003693107_SI.pdf]

# Supporting Information

Burov et al. 10.1073/pnas.1003693107

## SI Text

The process  $\mathbf{x}(s)$  defined in Eq. [12] is a Markov process. The equation of motion for the probability density function (pdf)  $P_M(x,s|x_0,0)$  is the regular Fokker–Planck equation, i.e., Eq. [10] with  $\alpha = 1$ . The solution for the initial condition  $P_M(x,0|x_0,0) = \delta(x - x_0)$  is then obtained using the eigenfunctions and eigenvalues of the Fokker–Planck operator  $L_{\text{FP}}\phi_n(x) = -\gamma_n \phi_n(x)$  ( $L_{\text{FP}} = -(\partial/\partial x)[F(x)/(k_B T)] + \partial^2/\partial x^2$ ) (1). A confining potential causes a discrete eigenvalue spectrum  $0 < \gamma_1 < \gamma_2 \dots$  and a stationary solution  $L_{\text{FP}}\phi_0(x) = 0$ . The pdf  $P_M(x,s|x_0,0)$  is (1)

$$P_M(x,s|x_0,0) = \sum_{n=0}^{\infty} e^{-\gamma_n K s} \hat{\phi}_n(x_0) \phi_n(x), \quad [\text{S1}]$$

with coefficients  $\hat{\phi}_n(x_0) = e^{U(x_0)/k_B T} \phi_n(x_0)$ , and the orthonormality relation  $\int_{-\infty}^{\infty} e^{U(x)/k_B T} \phi_n \phi_m dx = \delta_{nm}$ . Orthonormality relation  $\int_{-\infty}^{\infty} e^{\Phi(x)} \phi_n \phi_m dx = \delta_{nm}$  ( $\Phi(x) = \ln(D) - \frac{1}{D} \int F(x') dx'$ )  $P_M(x_2,s|x_1,0)$  is obtained from Eq. S1 by substituting  $x \rightarrow x_2$  and  $x_0 \rightarrow x_1$ . The Laplace transform of  $P_M(x,s|x_0,0)$ ,  $\tilde{P}_M(x,\lambda|x_0,0) = \int_0^{\infty} e^{-s\lambda} P_M(x,s|x_0,0) ds$ , is given by

$$\tilde{P}_M(x,\lambda|x_0,0) = \frac{e^{-U(x)/k_B T}}{\lambda Z} + \sum_{n=1}^{\infty} \frac{\hat{\phi}_n(x_0) \phi_n(x)}{\lambda + \gamma_n K}, \quad [\text{S2}]$$

where we used the Boltzmann equilibrium pdf for the ground state solution of Fokker–Planck equation, and  $Z = \int_{-\infty}^{\infty} e^{-U(x)/k_B T} dx$  is the normalizing partition function. We are now ready to compute the correlation function (CF)  $\langle x(t_1)x(t_2) \rangle$ . Using the definition for the Laplace transform of the two-time CF

$$\langle x(\lambda_2)x(\lambda_1) \rangle = \int_{-\infty}^{\infty} \int_{-\infty}^{\infty} x_1 x_2 f(x_2, \lambda_2; x_1, \lambda_1) dx_1 dx_2, \quad [\text{S3}]$$

and applying Eq. 20 and Eq. S2, we obtain

$$\begin{aligned} \langle x(\lambda_2)x(\lambda_1) \rangle &= \frac{\lambda_1^\alpha - \Lambda^\alpha + \lambda_2^\alpha}{\lambda_1 \lambda_2} \left[ \frac{\langle x^2 \rangle_B}{\Lambda^\alpha} + \sum_{n_1=1}^{\infty} \frac{\hat{\phi}_{n_1}(x_0) C_{n_1}^{(1)}}{\Lambda^\alpha + \gamma_{n_1} K_\alpha} \right] \\ &+ \frac{(\lambda_2^\alpha)(\Lambda^\alpha - \lambda_2^\alpha)}{\lambda_1 \lambda_2} \left[ \frac{\langle x \rangle_B^2}{\lambda_2^\alpha \Lambda^\alpha} + \frac{\langle x \rangle_B}{\lambda_2^\alpha} \sum_{n_2=1}^{\infty} \frac{\hat{\phi}_{n_2}(x_0) C_{n_2}^{(2)}}{\Lambda^\alpha + \gamma_{n_2} K_\alpha} \right] \\ &+ \sum_{n_3=1}^{\infty} \frac{C_{n_3}^{(3)} C_{n_3}^{(2)}}{\Lambda^\alpha (\lambda_2^\alpha + \gamma_{n_3} K_\alpha)} \\ &+ \sum_{n_4=1}^{\infty} \sum_{n_5=1}^{\infty} \frac{C_{n_4, n_5}^{(4)} C_{n_4}^{(2)} \hat{\phi}_{n_5}(x_0)}{(\lambda_2^\alpha + \gamma_{n_4} K_\alpha) (\Lambda^\alpha + \gamma_{n_5} K_\alpha)} \\ &+ \frac{(\lambda_1^\alpha)(\Lambda^\alpha - \lambda_1^\alpha)}{\lambda_1 \lambda_2} \left[ \frac{\langle x \rangle_B^2}{\lambda_1^\alpha \Lambda^\alpha} + \frac{\langle x \rangle_B}{\lambda_1^\alpha} \sum_{n'_2=1}^{\infty} \frac{\hat{\phi}_{n'_2}(x_0) C_{n'_2}^{(2)}}{\Lambda^\alpha + \gamma_{n'_2} K_\alpha} \right] \\ &+ \sum_{n'_3=1}^{\infty} \frac{C_{n'_3}^{(3)} C_{n'_3}^{(2)}}{\Lambda^\alpha (\lambda_1^\alpha + \gamma_{n'_3} K_\alpha)} \\ &+ \sum_{n'_4=1}^{\infty} \sum_{n'_5=1}^{\infty} \frac{C_{n'_4, n'_5}^{(4)} C_{n'_4}^{(2)} \hat{\phi}_{n'_5}(x_0)}{(\lambda_1^\alpha + \gamma_{n'_4} K_\alpha) (\Lambda^\alpha + \gamma_{n'_5} K_\alpha)}, \quad [\text{S4}] \end{aligned}$$

where  $\Lambda \equiv \lambda_1 + \lambda_2$  and

$$\begin{aligned} C_n^{(1)} &= \int_{-\infty}^{\infty} x^2 \phi_n(x) dx & C_n^{(2)} &= \int_{-\infty}^{\infty} x \phi_n(x) dx \\ C_n^{(3)} &= \frac{1}{Z} \int_{-\infty}^{\infty} x \hat{\phi}_n(x) \exp[-U(x)/k_B T] dx \\ C_{n,n'}^{(4)} &= \int_{-\infty}^{\infty} x \hat{\phi}_n(x) \phi_{n'}(x) dx. \end{aligned} \quad [\text{S5}]$$

$C_n^{(3)} = \int_{-\infty}^{\infty} x \tilde{\phi}_n(x) \exp[-U(x)/k_B T] / Z dx$ , and the symbol  $\langle \dots \rangle_B$  denotes an average over the Boltzmann distribution, e.g.,

$$\langle x^2 \rangle_B = \frac{1}{Z} \int_{-\infty}^{\infty} x^2 \exp[-U(x)/k_B T] dx. \quad [\text{S6}]$$

All terms of Eq. S4 that are  $\gamma_n$  dependent ( $n > 0$ ) are equivalent to the transient part of the CF for a normally diffusing particle  $\alpha \rightarrow 1$ . Although the  $\gamma_n$  dependent components could be inverted into time-domain explicitly, for our purpose here it suffices to use Tauberian theorems (2) for  $\lambda_1 \rightarrow 0$  and  $\lambda_2 \rightarrow 0$ , in the limit  $\lambda_1^\alpha \ll \gamma_n K_\alpha$  and  $\lambda_2^\alpha \ll \gamma_n K_\alpha$  the leading order for the power series of the transient part is of the form  $\lambda^{-\alpha}$  and therefore all transient terms decay to zero at least as  $t^{-\alpha}$  for  $t_2 \gg 1/(K_\alpha \gamma_1)^{1/\alpha}$ ,  $t_1 \gg 1/(K_\alpha \gamma_1)^{1/\alpha}$ , where  $\gamma_1$  is the smallest nonzero eigenvalue. The remaining part

$$\frac{\lambda_1^\alpha - \Lambda^\alpha + \lambda_2^\alpha \langle x^2 \rangle_B}{\lambda_1 \lambda_2} + \frac{(\lambda_2^\alpha)(\Lambda^\alpha - \lambda_2^\alpha) \langle x \rangle_B^2}{\lambda_1 \lambda_2 \lambda_2^\alpha \Lambda^\alpha} + \frac{(\lambda_1^\alpha)(\Lambda^\alpha - \lambda_1^\alpha) \langle x \rangle_B^2}{\lambda_1 \lambda_2 \lambda_1^\alpha \Lambda^\alpha} \quad [\text{S7}]$$

is equivalent to the stationary behavior of the normally diffusing particle (i.e., independent of all the nonzero eigenvalues of  $L_{\text{FP}}$ ) and depends only on equilibrium quantities. S7 is transformed into the time domain using the Laplace inversion

$$\mathcal{L}^{-1}\{1/(\lambda_2 \lambda_1^{1-\alpha} \Lambda^\alpha)\} = \theta(t_2 - t_1) + \theta(t_1 - t_2) B(t_2/t_1, \alpha, 1 - \alpha) / [\Gamma(\alpha) \Gamma(1 - \alpha)], \quad [\text{S8}]$$

where  $B(z, a, b) = \int_0^z y^{a-1} (1-y)^{b-1} dy$  is the incomplete beta function (3). For the two-time CF we obtain

$$\langle x(t_2)x(t_1) \rangle \sim (\langle x^2 \rangle_B - \langle x \rangle_B^2) \frac{B(t_1/t_2, \alpha, 1 - \alpha)}{\Gamma(\alpha) \Gamma(1 - \alpha)} + \langle x \rangle_B^2 \quad [\text{S9}]$$

in the limit  $t_2 \geq t_1 \gg (1/K_\alpha \gamma_1)^{1/\alpha}$ .

1. Risken H (1984) *The Fokker-Planck Equation* (Springer, Berlin).
2. Feller W (1969) *An Introduction to Probability Theory and Its Applications* (Wiley Eastern, New Delhi), Vol. 2.

3. Abramowitz M, Stegun I (1971) *Handbook of Mathematical Functions* (Dover, New York).
